# Supplementary material for: Interplay between cohesin and TORC1 links chromosome segregation and gene expression to environmental changes
Source: eLife journal article supplement (doi:10.7554/elife.108275), 2025-11-18

Figure 4-source data 2. The original images are at the top; the final composite is at the bottom.

Figure 4B

INPUT

IP anti-PK

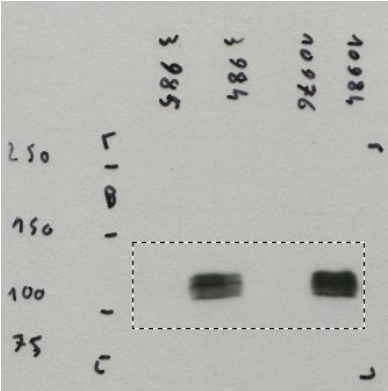

Figure 4B\_INPUT\_blot PK

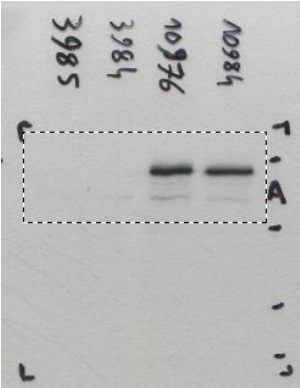

Figure 4B\_INPUT\_blot FLAG

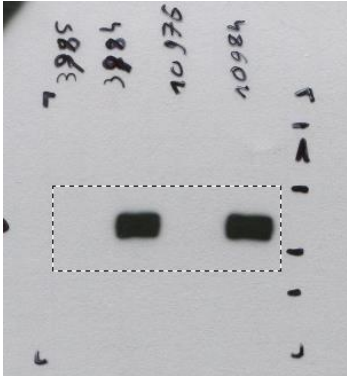

Figure 4B\_IP PK\_blot PK

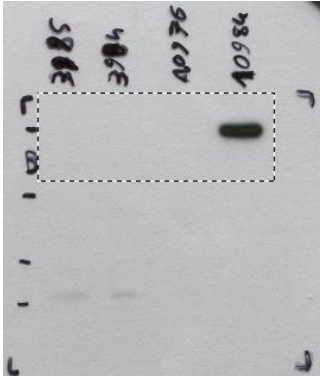

Figure 4B\_IP PK\_blot FLAG

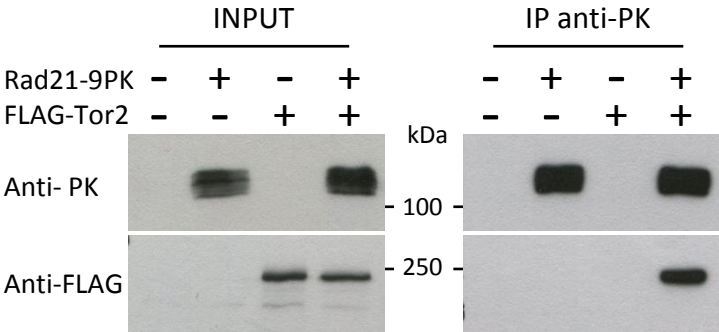

Figure 4C-left

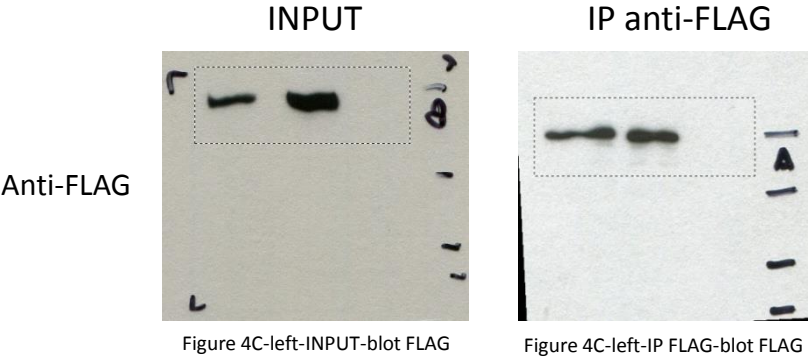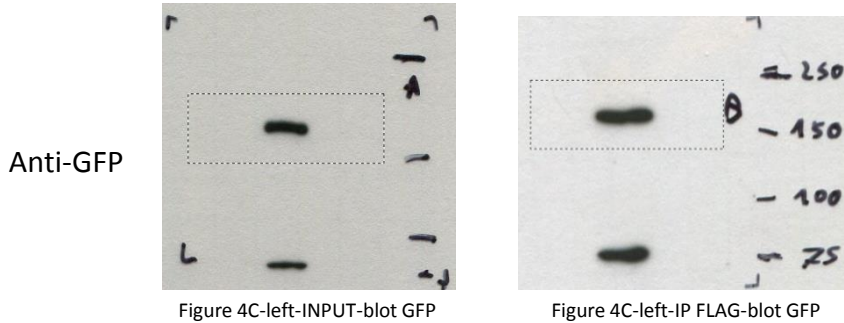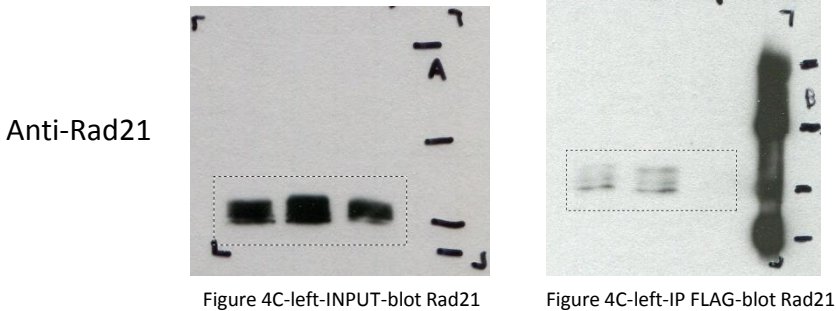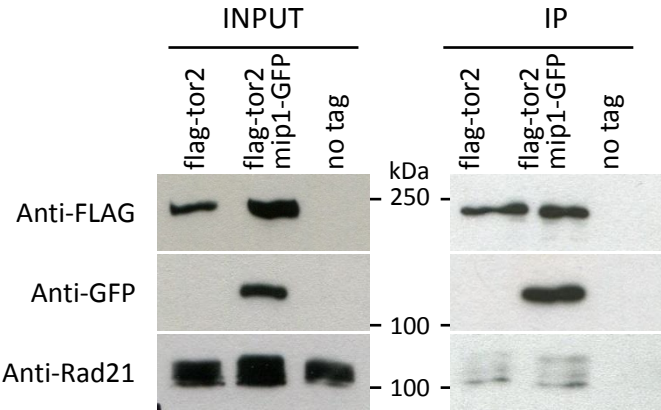

## Figure 4C-right

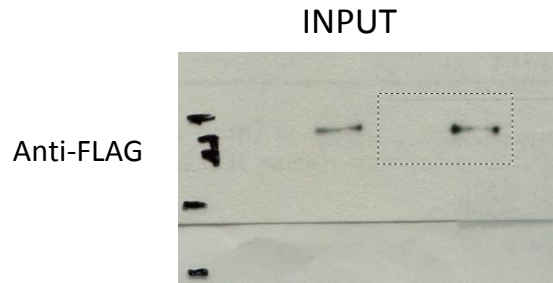

Figure 4C-right-INPUT-blot Psm1&FLAG

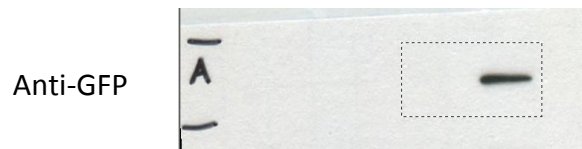

Figure 4C-right-INPUT-blot GFP&Rad21

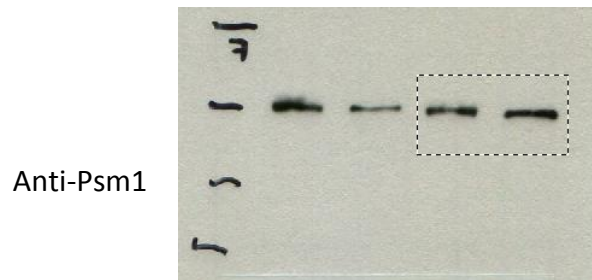

Figure 4C-right-INPUT-blot Psm1&FLAG

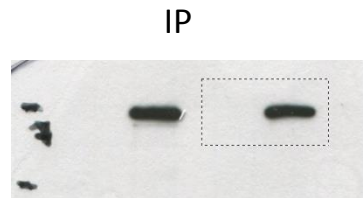

Figure 4C-right-IP FLAG-blot FLAG

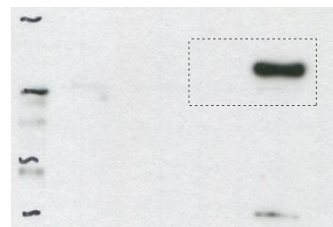

Figure 4C-right-IP-blot GFP

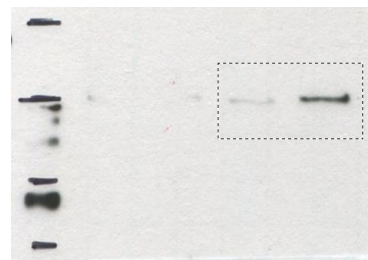

Figure 4C-right-IP-blot Psm1

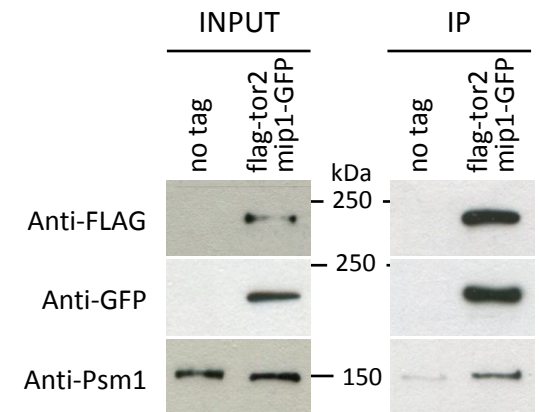

Supplement: fig4-data2 [file Figure 4–source data 2.pdf › Figure 4-source data 2/Figure 4–source data 2.pdf]
