# Supplementary material for: Interplay between cohesin and TORC1 links chromosome segregation and gene expression to environmental changes
Source: eLife journal article supplement (doi:10.7554/elife.108275), 2025-11-18

Figure 1-source data 2. Composite of Figure 1C. The original images are on the left; the final composite is on the right.

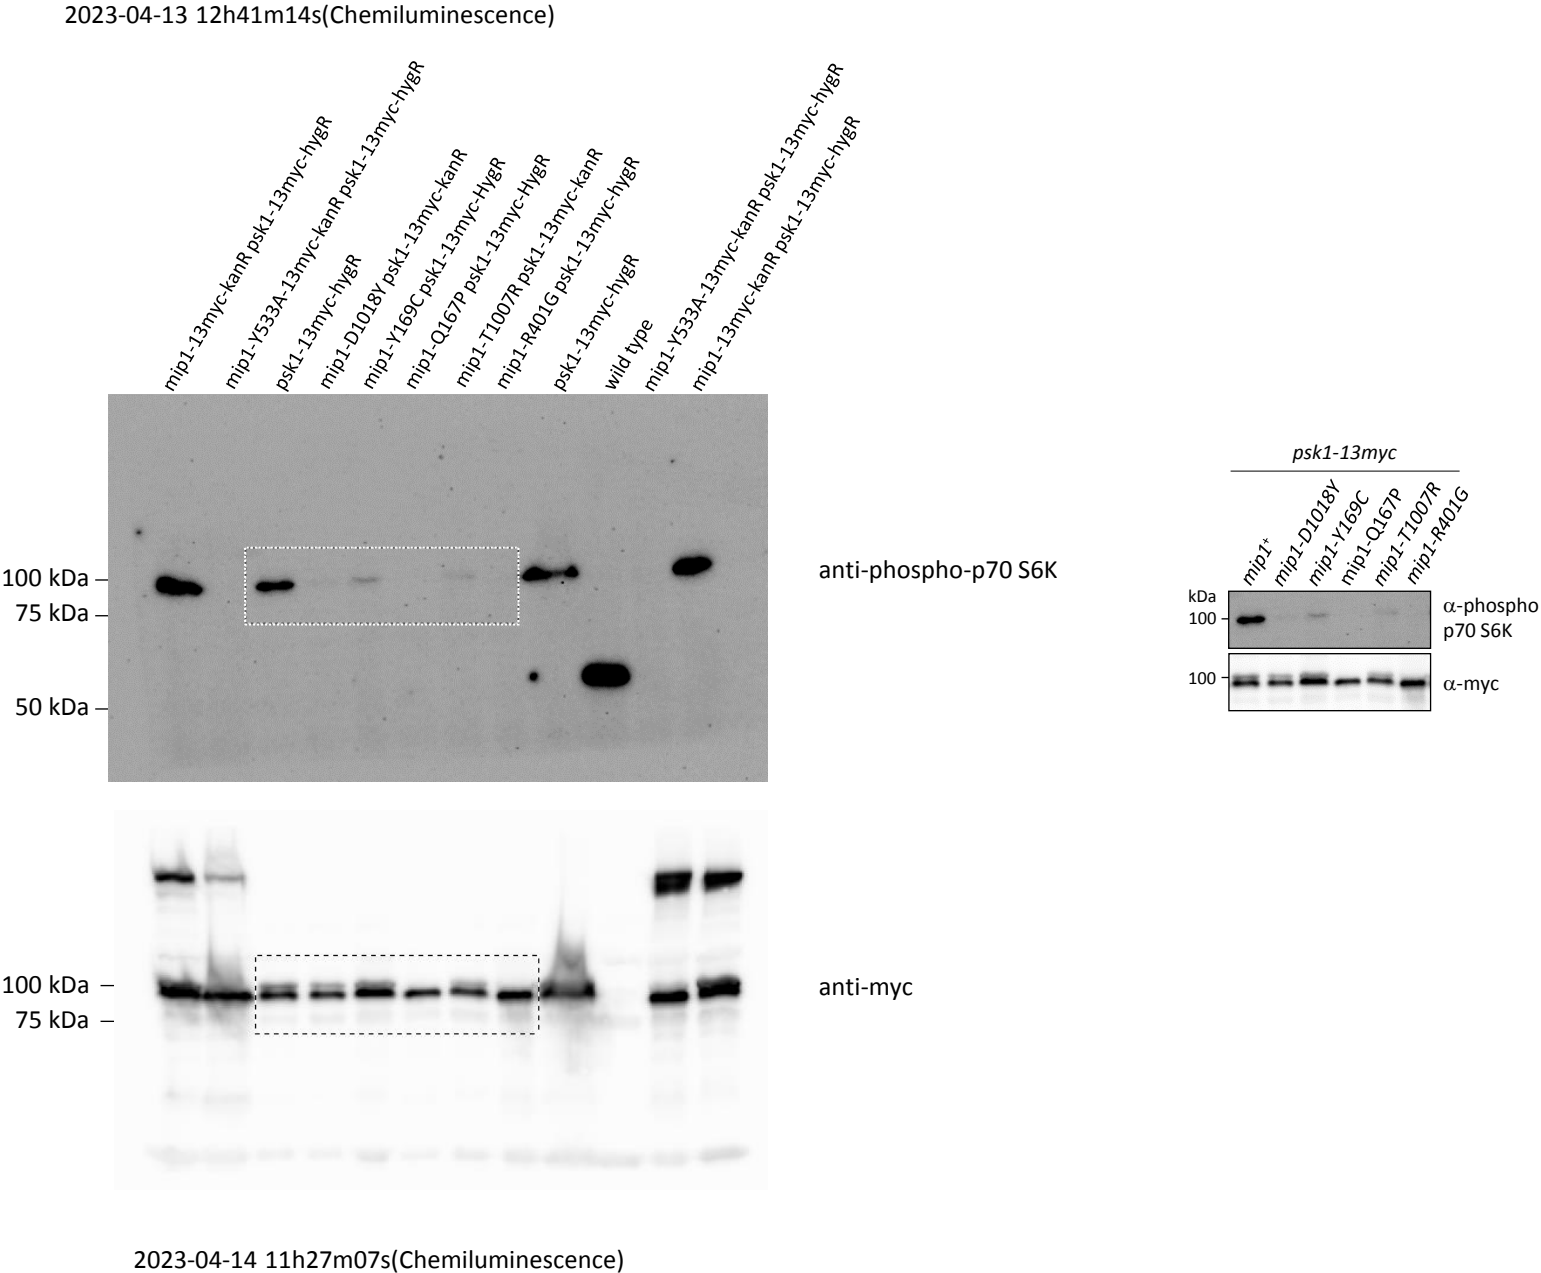

Supplement: fig1-data2 [file Figure 1–source data 2.pdf › Figure 1-source data 2/Figure 1–source data 2.pdf]
