# Supplementary material for: Interplay between cohesin and TORC1 links chromosome segregation and gene expression to environmental changes
Source: eLife journal article supplement (doi:10.7554/elife.108275), 2025-11-18

Figure 2-figure supplement 3-source data 2. Composite for panel B. The original images are at the top; the final composite is at the bottom.

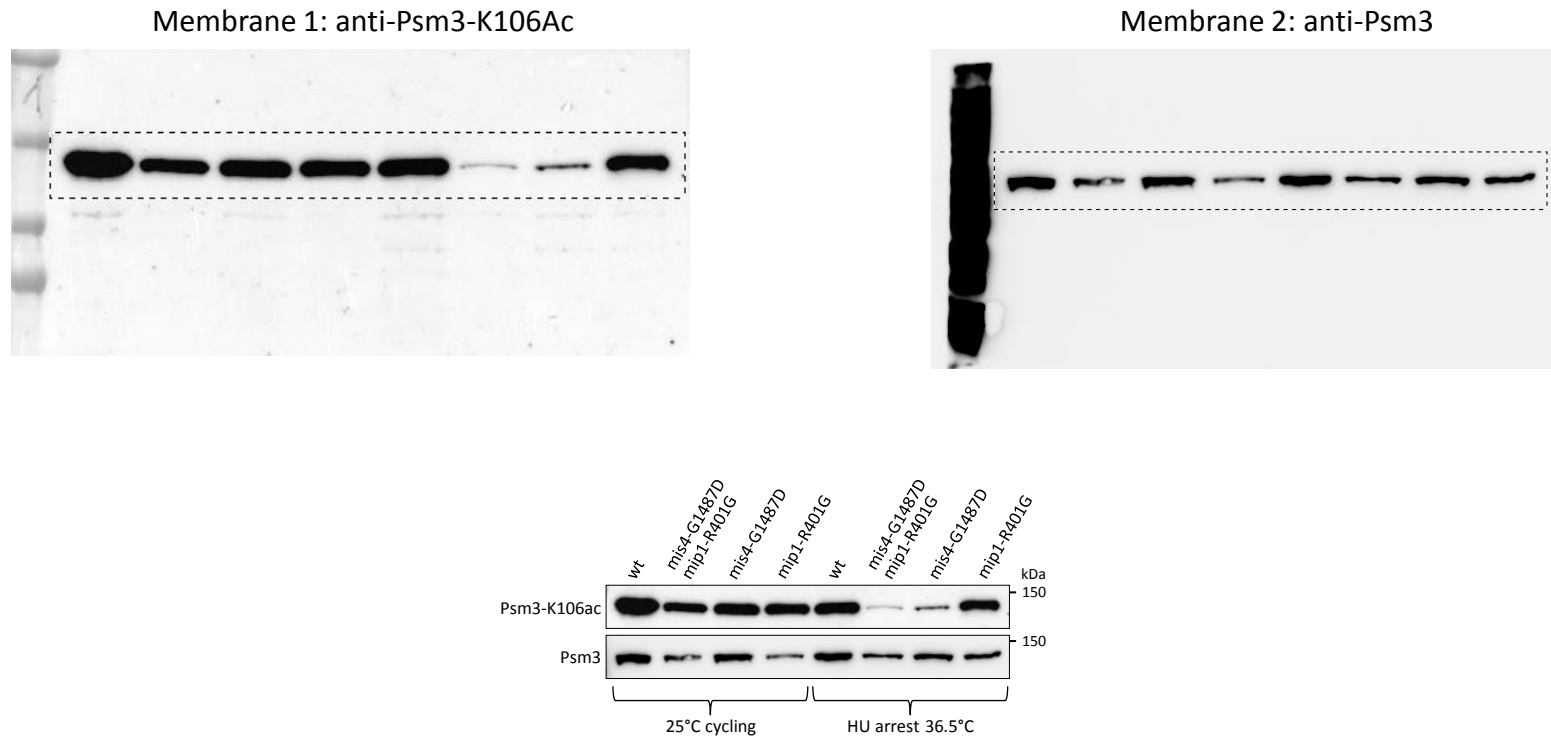

Supplement: fig2-figsupp3-data2 [file Figure 2–figure supplement 3-source data 2.pdf › Figure 2-figure supplement 3-source data 2/Figure 2–figure supplement 3-source data 2.pdf]
