# Supplementary material for: Interplay between cohesin and TORC1 links chromosome segregation and gene expression to environmental changes
Source: eLife journal article supplement (doi:10.7554/elife.108275), 2025-11-18

Figure 4-figure supplement 1-source data 2. Composite for panel B and C. The original images are at the top; the final composite is at the bottom.

Panel B

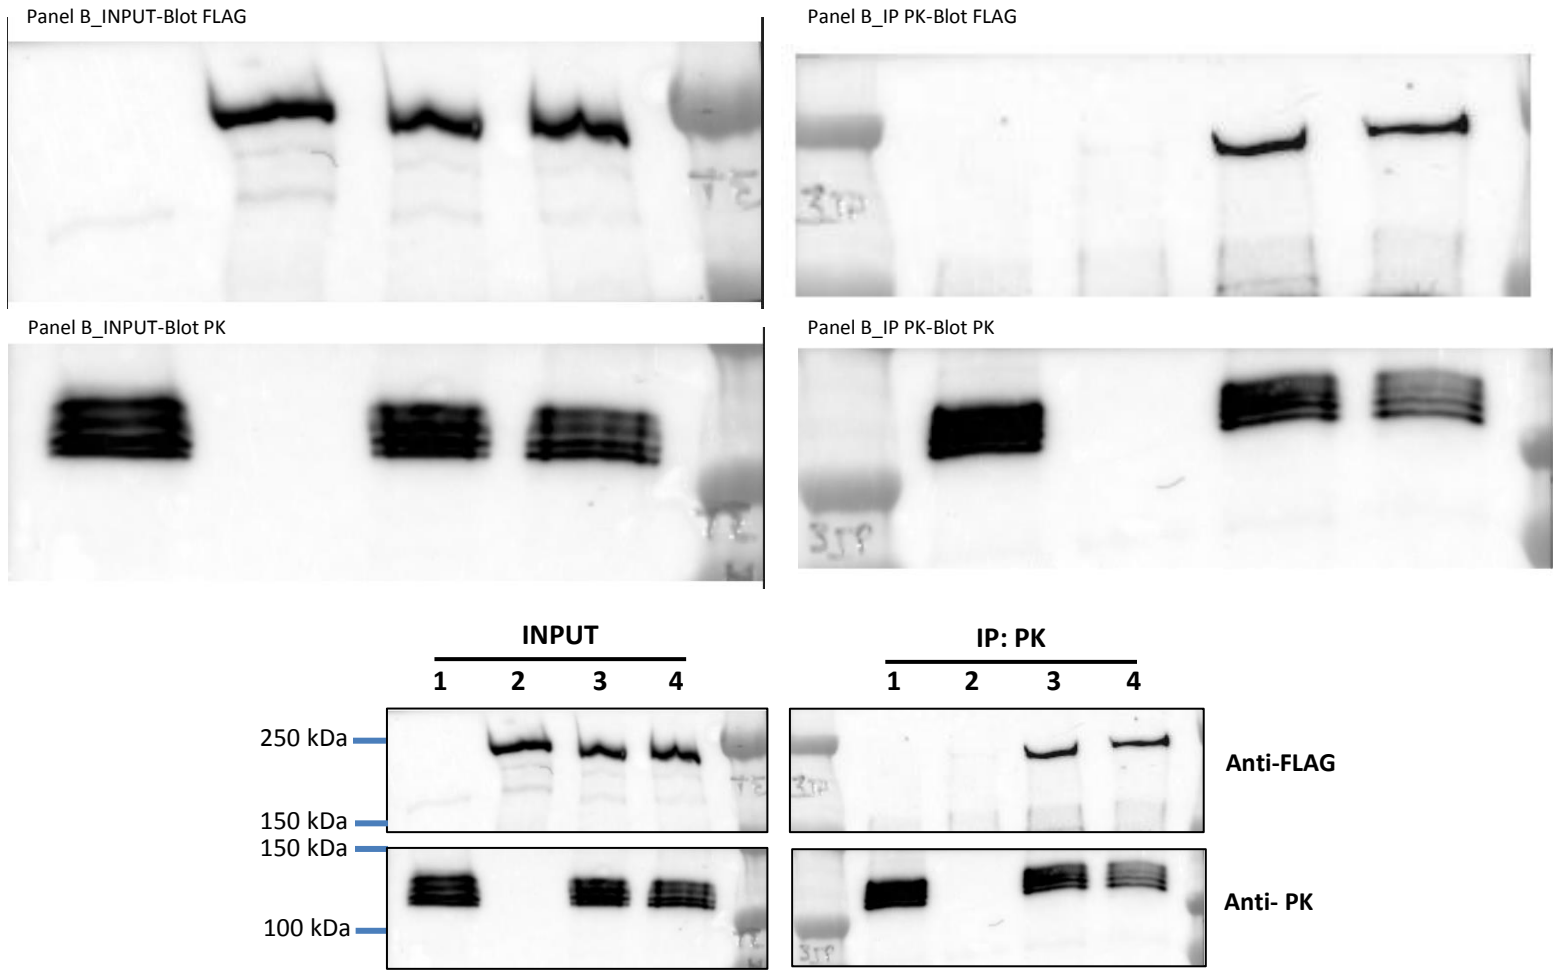

## Panel C

Panel C\_INPUT-Blot FLAG

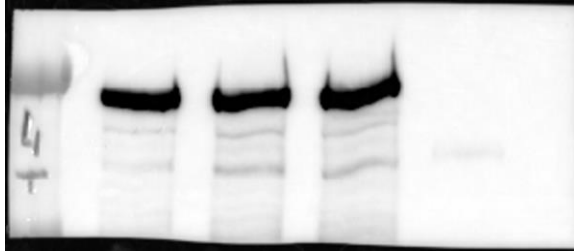

Panel C\_IP FLAG-Blot FLAG

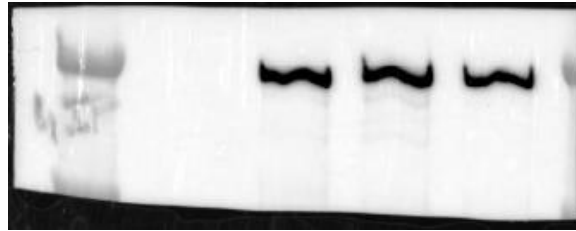

Panel C\_INPUT-Blot PK

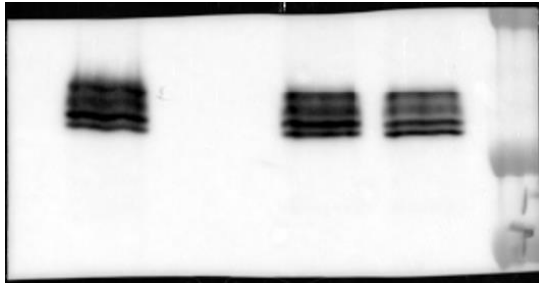

Panel C\_IP FLAG-Blot PK

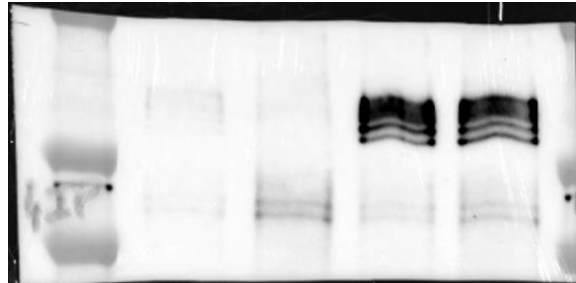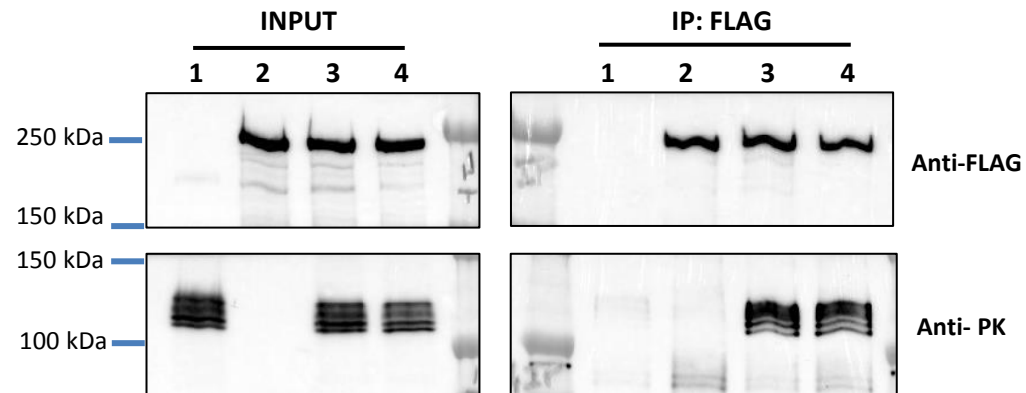

Supplement: fig4-figsupp1-data2 [file Figure 4-figure supplement 1-source data 2.pdf › Figure 4-figure supplement 1-source data 2/Figure 4-figure supplement 1-source data 2.pdf]
