# Supplementary material for: Interplay between cohesin and TORC1 links chromosome segregation and gene expression to environmental changes
Source: eLife journal article supplement (doi:10.7554/elife.108275), 2025-11-18

Figure 5-source data 2. The original images are on the left; the final composite is on the right.

Figure 5B

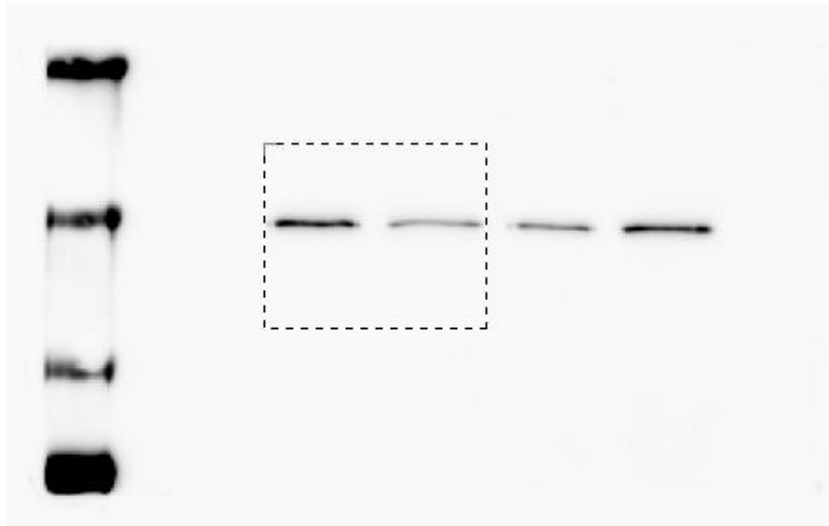

Figure 5B\_anti-Psm1-S1022p

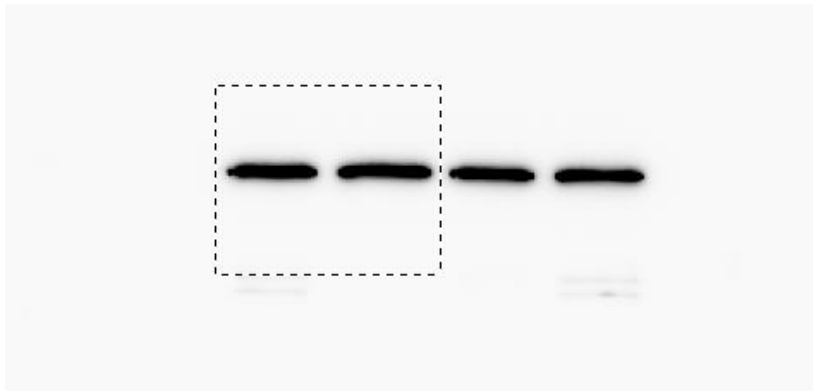

Figure 5B\_anti-Psm1

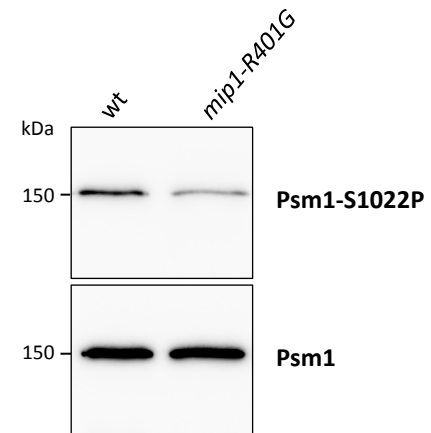

Figure 5C

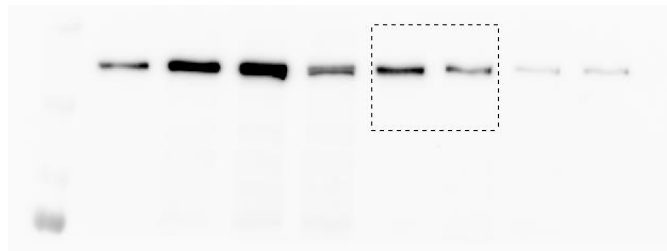

Figure 5C\_anti-Mis4-S183p

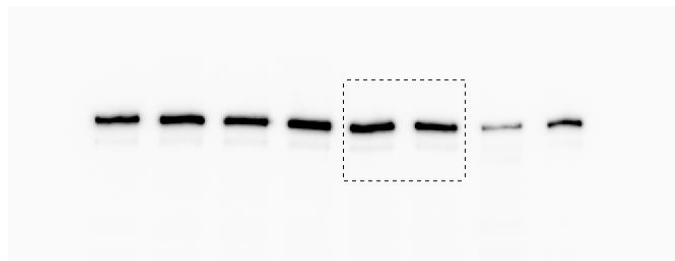

Figure 5C\_anti-GFP

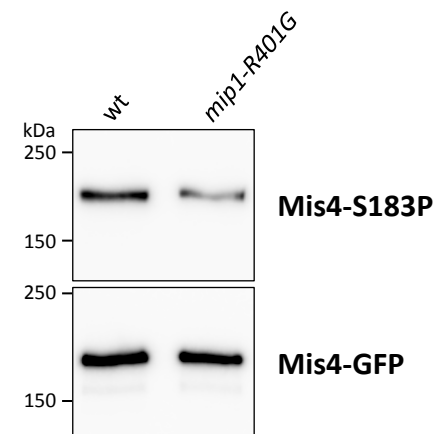

Figure 5D

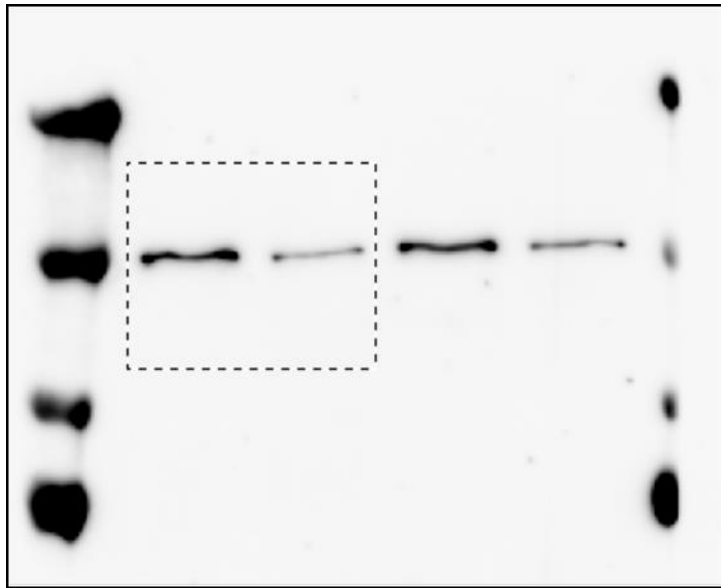

Figure 5D\_anti-Psm1-S1022p

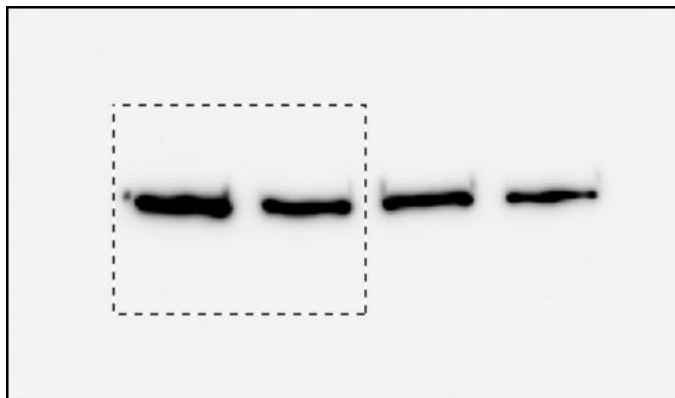

Figure 5D\_anti-Psm1

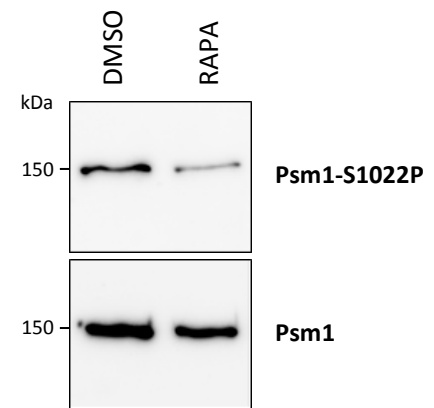

Figure 5E

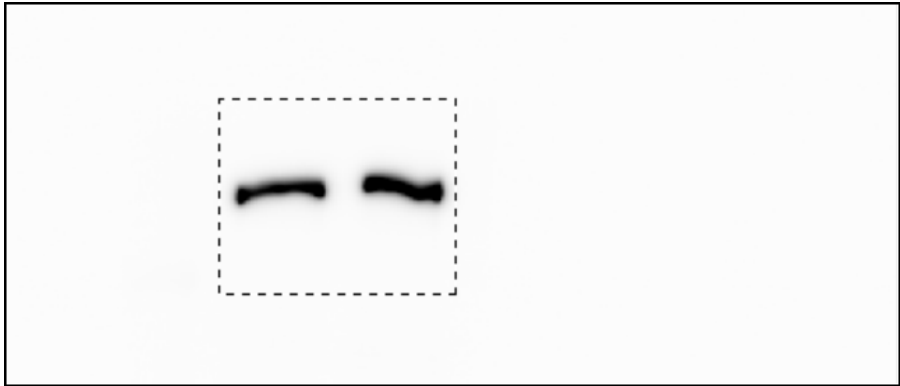

Figure 5E\_anti-Mis4-S183p

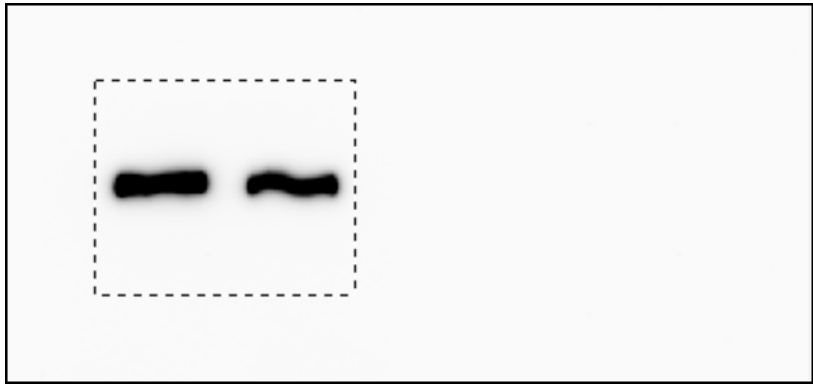

Figure 5E\_anti-GFP

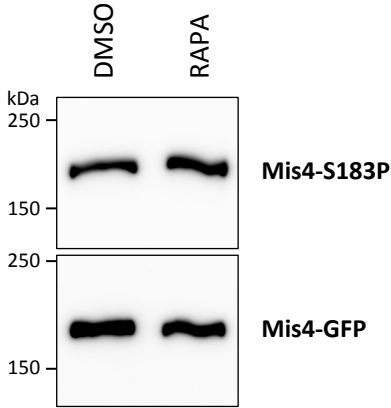

Supplement: fig5-data2 [file Figure 5–source data 2.pdf › Figure 5-source data 2/Figure 5–source data 2.pdf]
