# Supplementary material for: Interplay between cohesin and TORC1 links chromosome segregation and gene expression to environmental changes
Source: eLife journal article supplement (doi:10.7554/elife.108275), 2025-11-18

Figure 5-figure supplement 1-source data 2. The original images are on the left; the final composite is on the right.

Panel A

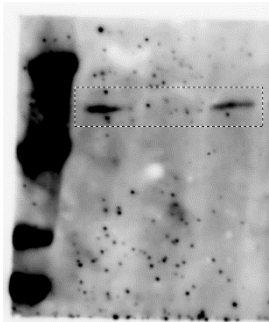

Panel A\_anti-Mis4-S183p

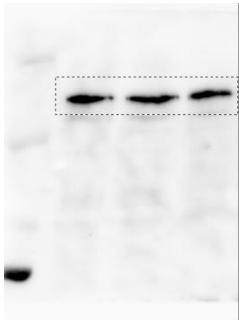

Panel A\_anti-GFP

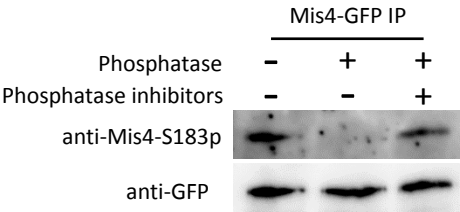

## Panel B

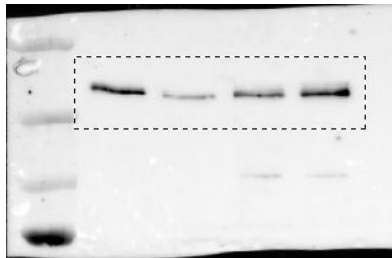

Panel B\_anti-Mis4-S183p

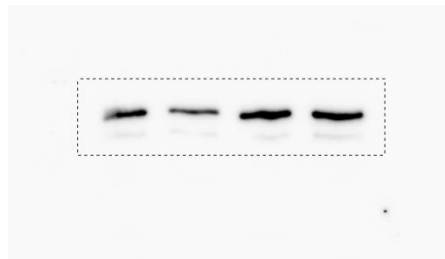

Panel B\_anti-GFP

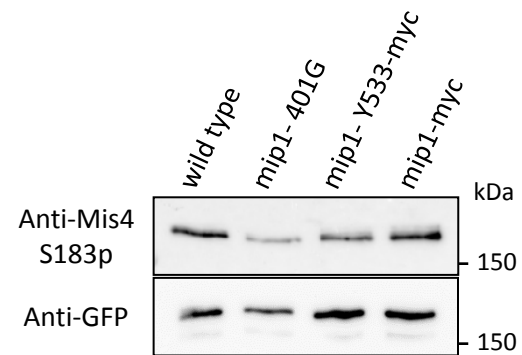

## Panel C

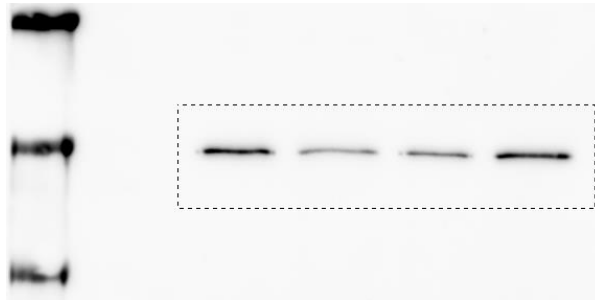

Panel C\_anti-Psm1-S1022p

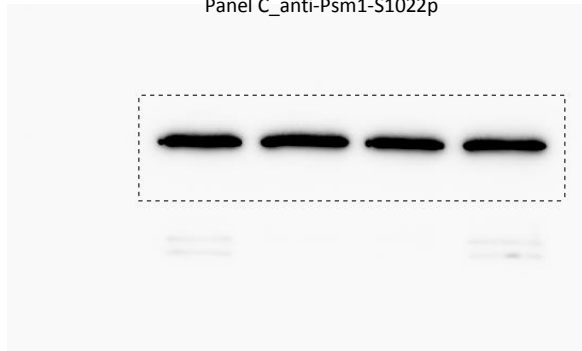

Panel C\_anti-Psm1

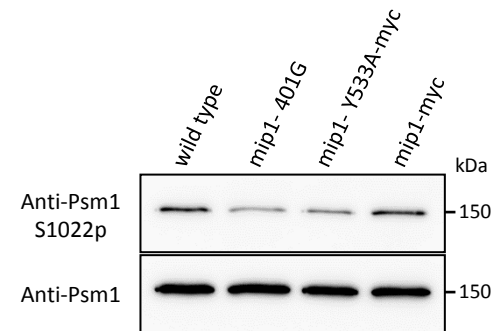

Supplement: fig5-figsupp1-data2 [file Figure 5-figure supplement 1–source data 2.pdf › Figure 5-figure supplement 1-source data 2/Figure 5-figure supplement 1–source data 2.pdf]
