# Supplementary material for: Interplay between cohesin and TORC1 links chromosome segregation and gene expression to environmental changes
Source: eLife journal article supplement (doi:10.7554/elife.108275), 2025-11-18

Figure 5-figure supplement 2-source data 2. The original images are on the left; the final composite is on the right.

## Panel B

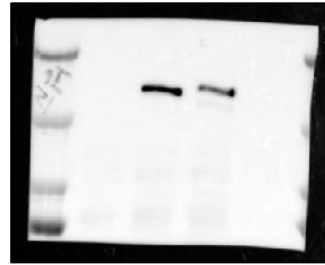

Panel B\_anti-GFP

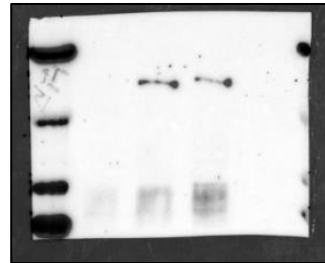

Panel B\_anti Mis4-S183p

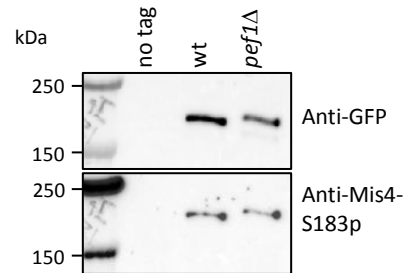

## Panel D Left

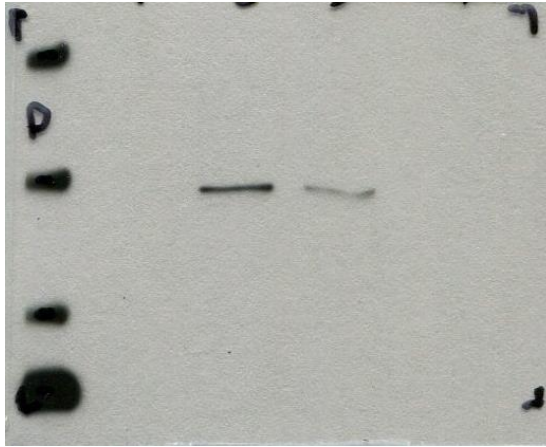

Panel D Left\_anti-Psm1-S1022p

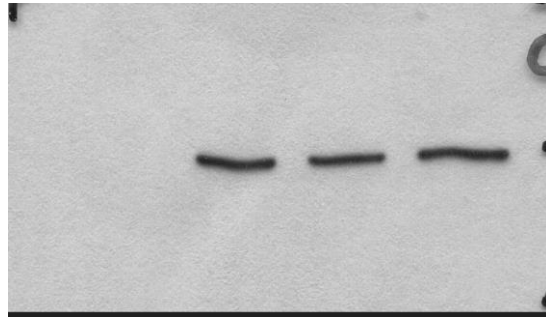

Panel D Left\_anti-Psm1

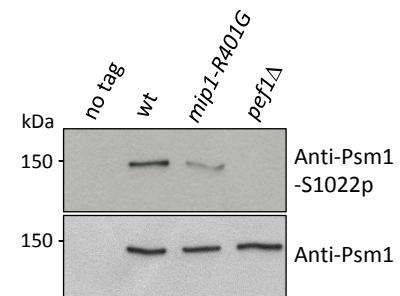

## Panel D Right

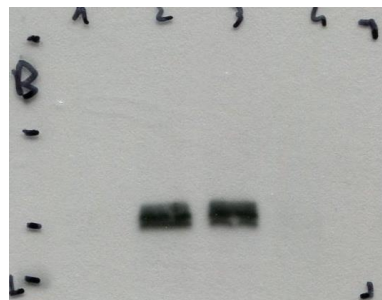

Panel D Right\_anti-Rad21-T262p

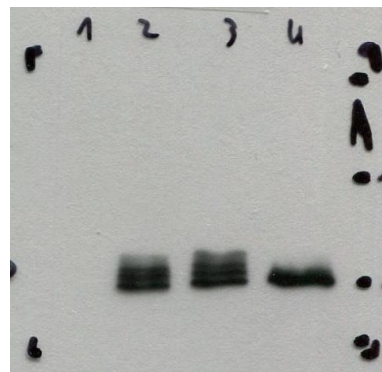

Panel D Right\_anti-FLAG

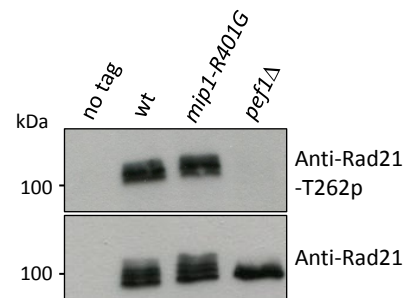

## Panel E

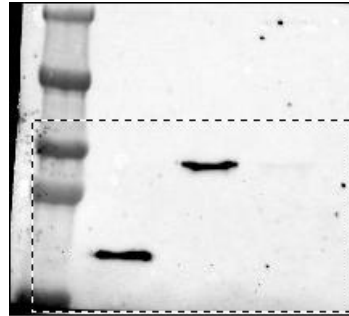

Panel E\_anti-Psk1p

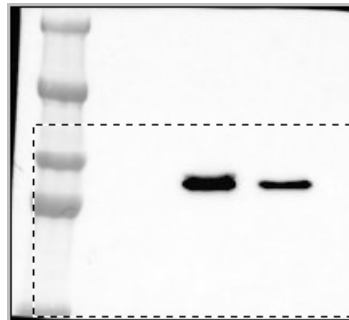

Panel E\_anti-myc

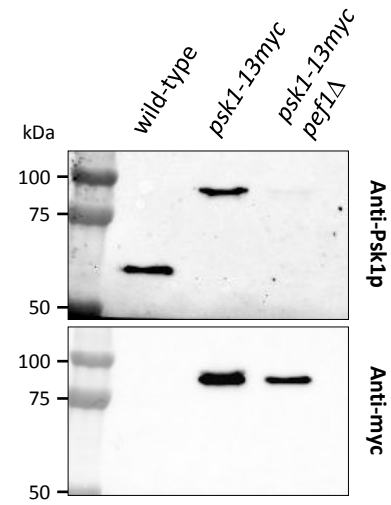

Supplement: fig5-figsupp2-data2 [file Figure 5-figure supplement 2–source data 2.pdf › Figure 5-figure supplement 2-source data 2/Figure 5-figure supplement 2–source data 2.pdf]
